# Supplementary material
Source: Springer Nature journal article supplement (https://www.springerprofessional.de/resource/supplementary/13638_2011_83_MOESM1_ESM.pdf/11897412)

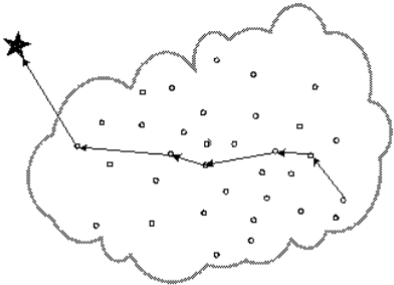

★ sink node    ○ sensor node    ☉ sensor field

Supplement: MOESM1 [file 11897412]
